# Supplementary material for: SnO2/SnS2 nanotubes for flexible room-temperature NH3 gas sensors
Source: Royal Society of Chemistry journal article supplement (doi:10.1039/c7ra10537a), 2017-01-01
Supplement: c7ra10537a1.pdf [file c7ra10537a1.pdf]

## Supporting information

### SnO<sub>2</sub>/SnS<sub>2</sub> Nanotubes for Flexible Room-Temperature NH<sub>3</sub> Gas Sensors

Rui Li <sup>a,c</sup>, Kai Jiang <sup>\*b</sup>, Shuai Chen <sup>a,c</sup>, Zheng Lou <sup>c</sup>, Tingting Huang <sup>a,c</sup>, Di Chen <sup>\*a</sup> and Guozhen Shen <sup>\*c</sup>

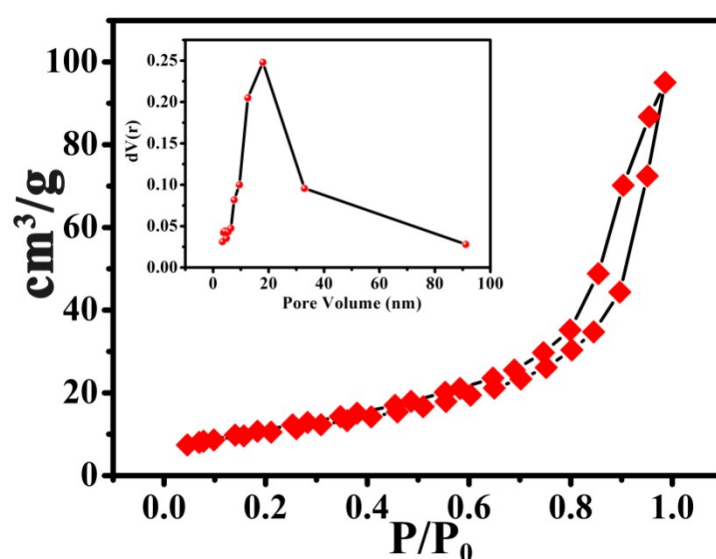

**Figure S1.** Isotherm plot and Halenda (BJH) pore size distribution plot (inset) of the SnO<sub>2</sub>/SnS<sub>2</sub> nanotubes

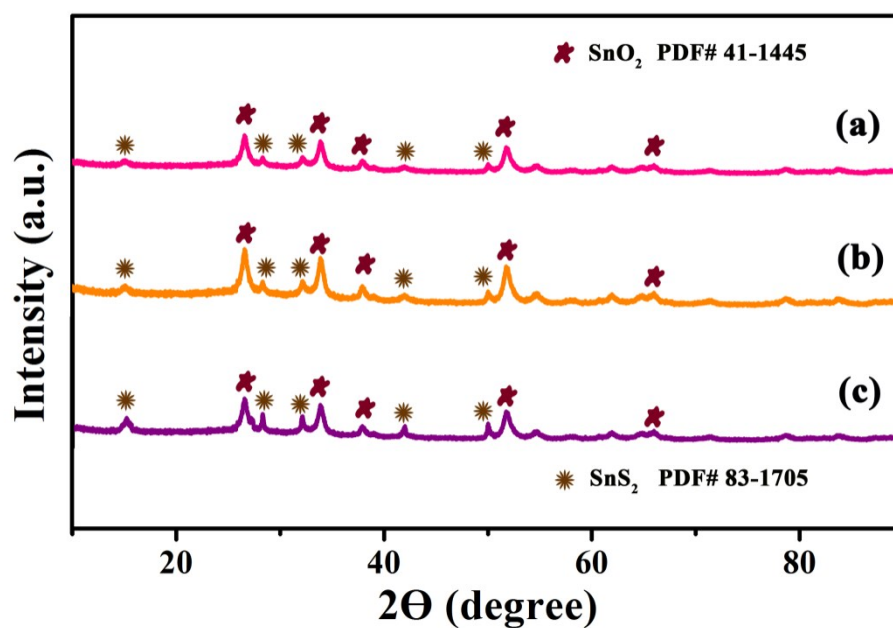

**Figure S2.** XRD patterns of as-synthesized products from in situ hydrothermal sulfuration route with CH<sub>3</sub>CSNH<sub>2</sub> concentration of (a) 8 (b) 10 (c) 14 mmol for 3 h.

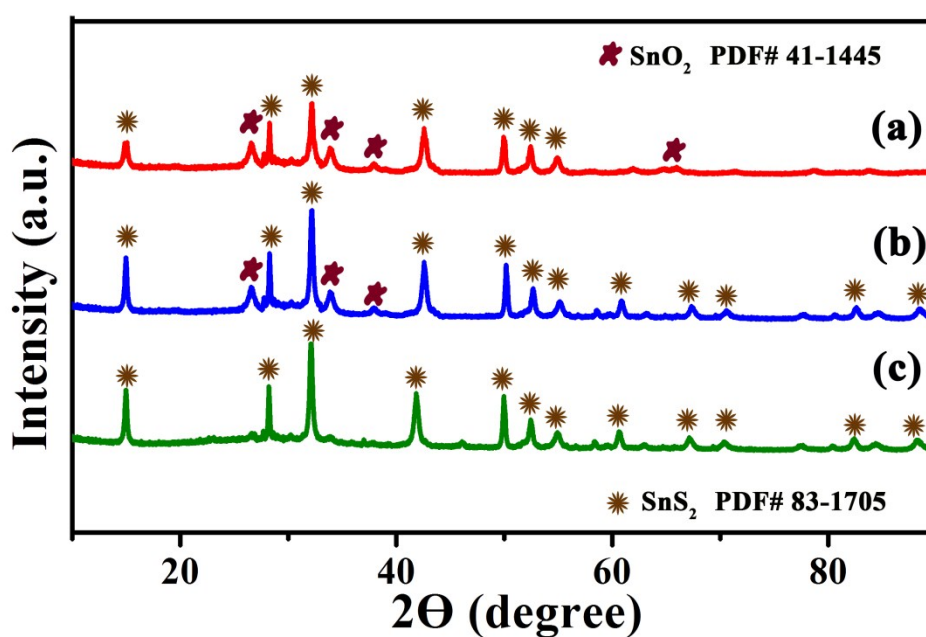

**Figure S3.** XRD patterns of the products from in situ hydrothermal sulfuration route with the same concentration of CH<sub>3</sub>CSNH<sub>2</sub> (12 mmol) for different time (a) 5 h (b) 7 h (c) 9 h.

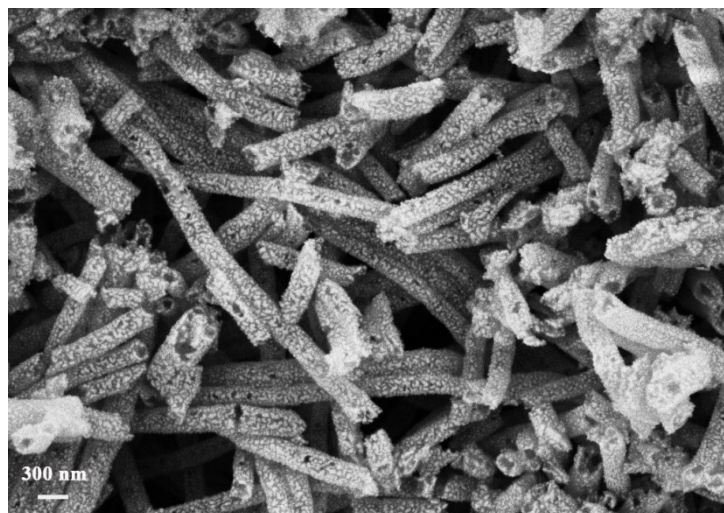

**Figure S4.** SEM image of the SnO<sub>2</sub>/SnS<sub>2</sub> nanotubes after NH<sub>3</sub> sensing test.
